# Supplementary material for: Proteomic Analysis of Proteins Responsive to Drought stress in barley
Source: Research Square preprint supplement (doi:10.21203/rs.3.rs-7475122/v1), 2025-10-14
Supplement: Supplementary file 3 [file e2452ab74bc7864a9d14be53.xlsx]

## Sheet: Sheet4
		Supplementary Table 1	Transverse Section																		Sagital Sextion
			4D			8D			16D			24D			32D			4D			8D			16D			24D			32D
	Hordeum vulgare r1 ID	Hordeum vulgare Morex V3	SMT	END	EMB	SMT	END	EMB	SMT	END	EMB	SMT	END	EMB	SMT	END	EMB	SMT	END	EMB	SMT	END	EMB	SMT	END	EMB	SMT	END	EMB	SMT	END	EMB
1	HORVU2Hr1G111300	HORVU.MOREX.r3.2HG0202350	161.52	1.15	0	91.83	0.46	65.02	46.43	0.01	51.12	37.97	0.1	2.77	0	0.08	1.19	161.52	1.15	0	91.83	0.46	65.02	46.43	0.01	51.12	37.97	0.1	2.77	0	0.08	1.19
2	HORVU6Hr1G074030	HORVU.MOREX.r3.6HG0613270	395	18.7	0	520.7	6.58	104.08	560.33	14.09	71.51	1003.35	155.81	181.25	0	783.8	335.29	395	18.7	0	520.7	6.58	104.08	560.33	14.09	71.51	1003.35	155.81	181.25	0	783.8	335.29
3	HORVU7Hr1G088200	HORVU.MOREX.r3.UnG0798500	0	0	0	0	0	0	0	0	0	0	0	0	0	0	0	0	0	0	0	0	0	0	0	0	0	0	0	0	0	0
4	HORVU6Hr1G049250	HORVU.MOREX.r3.UnG0808370	0	0	0	0	0	0	0	0	0	0	0	0	0	0	0	0	0	0	0	0	0	0	0	0	0	0	0	0	0	0
5	HORVU7Hr1G088190	HORVU.MOREX.r3.5HG0483130	0	0	0	0	0	0	0	0	0	0	0	0	0	0	0	0	0	0	0	0	0	0	0	0	0	0	0	0	0	0
6	HORVU5Hr1G062310	HORVU.MOREX.r3.5HG0480620	0	0	0	0	0	0	0	0	0	0	0	0	0	0	0	0	0	0	0	0	0	0	0	0	0	0	0	0	0	0
7	HORVU7Hr1G033900	HORVU.MOREX.r3.7HG0661950	1.15	0.98	0	1.43	0.28	0.43	1.02	0.29	0.55	1.3	0.36	0.54	0	0.46	0.72	1.15	0.98	0	1.43	0.28	0.43	1.02	0.29	0.55	1.3	0.36	0.54	0	0.46	0.72
8	HORVU5Hr1G072420	HORVU.MOREX.r3.5HG0490180	1077.85	1137.05	0	948.51	381.1	381.1	825.62	91.44	2146.54	1050.83	111.68	3306.42	0	191.43	3067.61	1077.85	1137.05	0	948.51	381.1	381.1	825.62	91.44	2146.54	1050.83	111.68	3306.42	0	191.43	3067.61
9	HORVU3Hr1G015680	HORVU.MOREX.r3.3HG0232890	21.27	0.05	0	9.71	0	0	6.48	0	0.66	1.27	0	0.14	0	0	0.3	21.27	0.05	0	9.71	0	0	6.48	0	0.66	1.27	0	0.14	0	0	0.3
10	HORVU3Hr1G015640	HORVU.MOREX.r3.3HG0232910	203.86	5.71	0	115.47	4.67	35.35	110.93	1.15	75.66	116.77	3.22	97.53	0	7.8	127.19	203.86	5.71	0	115.47	4.67	35.35	110.93	1.15	75.66	116.77	3.22	97.53	0	7.8	127.19
11	HORVU1Hr1G001020	HORVU.MOREX.r3.1HG0001110	0.27	0.49	0	6.93	1362.52	0.46	37.38	9180.39	0.53	1248.41	6267.37	0.51	0	9998.57	0	0.27	0.49	0	6.93	1362.52	0.46	37.38	9180.39	0.53	1248.41	6267.37	0.51	0	9998.57	0
12	HORVU1Hr1G000990	HORVU.MOREX.r3.1HG0001420	0.05	0.07	0	1.46	630.41	0.07	11.43	5473.11	0.04	316.99	4994.1	0	0	2516.23	0	0.05	0.07	0	1.46	630.41	0.07	11.43	5473.11	0.04	316.99	4994.1	0	0	2516.23	0
13	HORVU1Hr1G001420	HORVU.MOREX.r3.1HG0001420	0.05	0.07	0	1.46	630.41	0.07	11.43	5473.11	0.04	316.99	4994.1	0	0	2516.23	0	0.05	0.07	0	1.46	630.41	0.07	11.43	5473.11	0.04	316.99	4994.1	0	0	2516.23	0
14	HORVU2Hr1G073760	HORVU.MOREX.r3.2HG0167220	0.03	0.39	0	0	0.07	0.09	0.03	0	0	0.3	0.11	0	0	0.01	0	0.03	0.39	0	0	0.07	0.09	0.03	0	0	0.3	0.11	0	0	0.01	0
15	HORVU2Hr1G073760	HORVU.MOREX.r3.2HG0167220	0.03	0.39	0	0	0.07	0.09	0.03	0	0	0.3	0.11	0	0	0.01	0	0.03	0.39	0	0	0.07	0.09	0.03	0	0	0.3	0.11	0	0	0.01	0
16	HORVU2Hr1G073760	HORVU.MOREX.r3.2HG0167220	0.03	0.39	0	0	0.07	0.09	0.03	0	0	0.3	0.11	0	0	0.01	0	0.03	0.39	0	0	0.07	0.09	0.03	0	0	0.3	0.11	0	0	0.01	0
17	HORVU2Hr1G073760	HORVU.MOREX.r3.2HG0167220	0.03	0.39	0	0	0.07	0.09	0.03	0	0	0.3	0.11	0	0	0.01	0	0.03	0.39	0	0	0.07	0.09	0.03	0	0	0.3	0.11	0	0	0.01	0
18	HORVU2Hr1G073760	HORVU.MOREX.r3.2HG0167220	0.03	0.39	0	0	0.07	0.09	0.03	0	0	0.3	0.11	0	0	0.01	0	0.03	0.39	0	0	0.07	0.09	0.03	0	0	0.3	0.11	0	0	0.01	0
19	HORVU2Hr1G026810	HORVU.MOREX.r3.2HG0120840	0.14	0.21	0	3.38	158.59	31.49	170.91	812.26	2707.55	620.65	1385.98	3771.91	0	2004.17	2583.59	0.14	0.21	0	3.38	158.59	31.49	170.91	812.26	2707.55	620.65	1385.98	3771.91	0	2004.17	2583.59
20	HORVU6Hr1G053680	HORVU.MOREX.r3.6HG0591100	178.89	13.25	0	168.66	36.39	35.57	154.14	7.26	28.32	125.71	5.79	21.34	0	5.63	18.74	178.89	13.25	0	168.66	36.39	35.57	154.14	7.26	28.32	125.71	5.79	21.34	0	5.63	18.74
21	HORVU2Hr1G044650	HORVU.MOREX.r3.2HG0138840	62.91	2.47	0	90.96	1.44	2.89	36.46	2.16	3.02	18.63	2.82	8.87	0	5.58	6.43	62.91	2.47	0	90.96	1.44	2.89	36.46	2.16	3.02	18.63	2.82	8.87	0	5.58	6.43
22	HORVU3Hr1G059060	HORVU.MOREX.r3.3HG0276570	1039.68	339.84	0	1135.24	557.22	1135.24	904.8	163.81	571.53	742.57	135.06	167.04	0	138.81	150.94	1039.68	339.84	0	1135.24	557.22	1135.24	904.8	163.81	571.53	742.57	135.06	167.04	0	138.81	150.94
23	HORVU5Hr1G002150	HORVU.MOREX.r3.5HG0421460	3306.27	1618.72	0	1217.53	2196.9	3975.1	1151.39	1786.67	11025.4	1019.47	1523.64	1030.56	0	3131.86	5089.91	3306.27	1618.72	0	1217.53	2196.9	3975.1	1151.39	1786.67	11025.4	1019.47	1523.64	1030.56	0	3131.86	5089.91
24	HORVU5Hr1G096370	HORVU.MOREX.r3.5HG0511770	471.31	4.39	0	815.94	73.62	29.62	1054.96	58.64	168.38	761.72	26.3	231.44	0	34.35	65.34	471.31	4.39	0	815.94	73.62	29.62	1054.96	58.64	168.38	761.72	26.3	231.44	0	34.35	65.34
25	HORVU7Hr1G048820	HORVU.MOREX.r3.7HG0677930	0.07	4.02	0	0.8	0	0.5	0	0.06	0.13	0.1	0.14	0	0	0.1	0	0.07	4.02	0	0.8	0	0.5	0	0.06	0.13	0.1	0.14	0	0	0.1	0
26	HORVU0Hr1G003270	HORVU.MOREX.r3.2HG0173200	4.27	0.04	0	8.9	0.26	0.68	15.31	0.05	1.1	10.51	0.09	0.6	0	0.05	0.31	4.27	0.04	0	8.9	0.26	0.68	15.31	0.05	1.1	10.51	0.09	0.6	0	0.05	0.31
27	HORVU4Hr1G089510	HORVU.MOREX.r3.4HG0417260	0.28	0.4	0	1.5	127.55	0.12	24.89	20042.8	0.42	652.6	3153.91	0.29	0	13461.6	0.01	0.28	0.4	0	1.5	127.55	0.12	24.89	20042.8	0.42	652.6	3153.91	0.29	0	13461.6	0.01
28	HORVU5Hr1G124160	HORVU5Hr1G124160	0	0	0	0	0	0	0	0	0	0	0	0	0	0	0	0	0	0	0	0	0	0	0	0	0	0	0	0	0	0
29	HORVU5Hr1G038630	HORVU.MOREX.r3.5HG0469020	409.19	6.79	0	794.69	0.06	0.95	831.86	0.44	2.74	356.88	0.75	0.44	0	1.06	0.74	409.19	6.79	0	794.69	0.06	0.95	831.86	0.44	2.74	356.88	0.75	0.44	0	1.06	0.74
30	HORVU0Hr1G024560	HORVU.MOREX.r3.5HG0468970	618.89	12.77	0	1360.6	0.17	1.12	1361.45	0.89	2.03	612.96	2.04	0.19	0	1.44	0.3	618.89	12.77	0	1360.6	0.17	1.12	1361.45	0.89	2.03	612.96	2.04	0.19	0	1.44	0.3
31	HORVU0Hr1G026090	HORVU.MOREX.r3.1HG0037500	297	3.92	0	984.23	0.03	5.32	703.62	0.11	9.47	162.18	0.1	6.06	0	0.03	7.85	297	3.92	0	984.23	0.03	5.32	703.62	0.11	9.47	162.18	0.1	6.06	0	0.03	7.85
32	HORVU7Hr1G001030	HORVU.MOREX.r3.7HG0635350	1168.18	2.67	0	290.47	0	0	5.05	0.03	51.76	3.35	0	61.73	0	0.01	33.79	1168.18	2.67	0	290.47	0	0	5.05	0.03	51.76	3.35	0	61.73	0	0.01	33.79
33	HORVU5Hr1G032650	HORVU.MOREX.r3.5HG0451540	212.58	39.46	0	230.68	418.49	154.14	348.51	84.97	132.73	311.69	54.73	191.22	0	43.23	195.09	212.58	39.46	0	230.68	418.49	154.14	348.51	84.97	132.73	311.69	54.73	191.22	0	43.23	195.09
34	HORVU5Hr1G002150	HORVU.MOREX.r3.5HG0421460	3306.27	1618.72	0	1217.53	2196.9	3975	115.39	1786.67	1102.43	1019.47	1523.64	4673.62	0	3131.86	5089.91	3306.27	1618.72	0	1217.53	2196.9	3975	115.39	1786.67	1102.43	1019.47	1523.64	4673.62	0	3131.86	5089.91
35	HORVU5Hr1G002040	HORVU.MOREX.r3.5HG0421370	421.45	393	0	471	731.38	471	584.82	222.26	605.89	562.84	219.27	324.15	0	231.16	323.94	421.45	393	0	471	731.38	471	584.82	222.26	605.89	562.84	219.27	324.15	0	231.16	323.94
36	HORVU2Hr1G029840	HORVU.MOREX.r3.2HG0123830	17.02	0.3	0	11.49	9.87	2.68	12.01	1.83	18.92	7.16	2.42	14.81	0	1.43	12.89	17.02	0.3	0	11.49	9.87	2.68	12.01	1.83	18.92	7.16	2.42	14.81	0	1.43	12.89
37	HORVU4Hr1G004890	HORVU.MOREX.r3.4HG0335040	0.04	0	0	0.03	0	0	0	0	0.02	0	0	0	0	0	0	0.04	0	0	0.03	0	0	0	0	0.02	0	0	0	0	0	0
38	HORVU4Hr1G040770	HORVU.MOREX.r3.5HG0456950	91.19	36.74	0	76.92	25.54	63.49	59.13	19.36	64.63	64.49	28.68	50.87	0	32.67	35.15	91.19	36.74	0	76.92	25.54	63.49	59.13	19.36	64.63	64.49	28.68	50.87	0	32.67	35.15
39	HORVU5Hr1G038710	HORVU.MOREX.r3.4HG0370860	326.31	284.16	0	295.15	153.26	302.35	230.43	53.39	229.61	226.9	55.04	157.01	0	65.84	140.17	326.31	284.16	0	295.15	153.26	302.35	230.43	53.39	229.61	226.9	55.04	157.01	0	65.84	140.17
40	HORVU7Hr1G043150	HORVU.MOREX.r3.7HG0671890	16.32	3.01	0	33.56	8.34	4.15	53.34	2.86	3.25	61.24	5.36	2.21	0	3.34	1.35	16.32	3.01	0	33.56	8.34	4.15	53.34	2.86	3.25	61.24	5.36	2.21	0	3.34	1.35
41	HORVU4Hr1G057210	HORVU.MOREX.r3.4HG0385790	99.13	684.01	0	106.56	393.3	1513.74	112.96	115.3	940.57	34.71	28.01	41.71	0	12.77	11	99.13	684.01	0	106.56	393.3	1513.74	112.96	115.3	940.57	34.71	28.01	41.71	0	12.77	11
42	HORVU4Hr1G038960	HORVU.MOREX.r3.4HG0369570	1275.59	518.13	0	1260.74	661.58	672.49	625.87	156.75	552.67	612.53	203.48	225.45	0	174.39	113.93	1275.59	518.13	0	1260.74	661.58	672.49	625.87	156.75	552.67	612.53	203.48	225.45	0	174.39	113.93
43	HORVU3Hr1G073780	HORVU.MOREX.r3.3HG0290880	351.72	29.3	0	638.27	66.13	30.15	702.88	17.32	214.55	250.5	19.74	667.2	0	58.09	367.38	351.72	29.3	0	638.27	66.13	30.15	702.88	17.32	214.55	250.5	19.74	667.2	0	58.09	367.38
44	HORVU7Hr1G090240	HORVU.MOREX.r3.7HG0720010	46.82	3.72	0	44.29	8.32	8.32	70.94	5.61	50.01	54.8	10.44	64.15	0	22.28	56.12	46.82	3.72	0	44.29	8.32	8.32	70.94	5.61	50.01	54.8	10.44	64.15	0	22.28	56.12
45	HORVU4Hr1G016810	HORVU.MOREX.r3.4HG0345760	70.44	6.38	0	97.57	25.38	71.49	32	25.18	169.66	19.32	41.48	116.67	0	112.85	144.45	70.44	6.38	0	97.57	25.38	71.49	32	25.18	169.66	19.32	41.48	116.67	0	112.85	144.45
46	HORVU3Hr1G088540	HORVU.MOREX.r3.3HG0304680	1295.78	2439.76	0	1489.72	3046.71	1733.81	545.4	1157.46	1371.31	643.23	1107.7	719.92	0	1182.73	472.18	1295.78	2439.76	0	1489.72	3046.71	1733.81	545.4	1157.46	1371.31	643.23	1107.7	719.92	0	1182.73	472.18
47	HORVU4Hr1G063350	HORVU.MOREX.r3.4HG0392240	6.28	0.01	0	27.03	0.39	0.28	34.28	27.81	14.94	69.53	36.03	108.88	0	92.67	51.03	6.28	0.01	0	27.03	0.39	0.28	34.28	27.81	14.94	69.53	36.03	108.88	0	92.67	51.03

## Sheet: Sheet5
		Supplementary Table S2
			Tissue Types																						Whole Spike						Provascular Tissue
			Vegatative Apex	Double Ridhe			Triple Mound			Glume Primordium			Legmma Primodium			Stamen Primordium			Awa Primordium			White Anther	Leaf Blade Base	Root Apical Meristem	Double Ridge	Triple Mound	Glume Primordium	Lemma Primordium	Stamen	Awn Primordium	Double Ridge	Triple Mound	Glume Primordium	Lemma Primordium	Stamen	Awn Primordium
		Hordeum vulgare Morex V3	I-Va-SAM	I-Dr-IM	I-Dr-LRM	I-Dr-SRM	I-Tm-IM	I-Tm-LSM	I-Tm-CSM	I-Gp-IM	I-Gp-LSM	I-Gp-CSM	I-Lp-IM	I-Lp-LSM	I-Lp-CSM	I-Sp-IM	I-Sp-LSM	I-Sp-CSM	I-Ap-IM	I-Ap-LSM	I-Ap-CSM	I-Wa-IM	I-LBB	I-RAM	W-DR	W-TM	W-GP	W-LP	W-SP	W-AP	R-DR	R-TM	R-GP	R-LP	R-SP	R-AP
	1	HORVU.MOREX.r3.2HG0202350	4.39	3.55	1.14	0.72	4.34	2.47	2.23	3.9	2.99	2.3	2.07	5.1	2.64	4.43	11.21	3.01	1.39	16.99	4.81	4.46	29.97	8.83	2.6	2.08	2.76	6	8.11	18.58	2.09	5.21	9.03	15.34	39.11	55.92
	2	HORVU.MOREX.r3.6HG0613270	44.78	32.39	4.54	6.07	34.63	34.02	25.71	33.15	21.9	21.61	19.82	28.59	17.11	29.15	31.01	24.68	21.72	21.17	17.15	4.3	25.62	200.27	53.47	32.65	20.32	41.12	20.05	23.01	96.66	133.5	49.27	34.93	16.52	13.12
	3	HORVU.MOREX.r3.UnG0798500	0	0	0	0	0	0	0	0	0	0	0	0	0	0	0	0	0	0	0	0	0	0	0	0	0	0	0	0	0	0	0	0	0	0
	4	HORVU.MOREX.r3.UnG0808370	5.88	2.45	10.5	2	4.24	5.05	6.29	2.84	4.47	3.54	6.15	6.36	4.62	5.45	5.59	4.66	3.96	11.07	5.32	2.44	114.22	1.19	2.65	6.73	6.19	4.59	7.05	5.61	4.64	15.91	21.78	23.86	23.32	47.01
	5	HORVU.MOREX.r3.5HG0483130	2.56	0.52	0.58	0.34	0.79	0.56	0.58	0.66	0.56	0.62	0.67	0.8	0.63	3.07	1.44	1.14	0.5	1.97	1.62	4.19	336.51	0.86	1.27	1.6	1.02	3.24	2.61	5.49	2.05	9.47	9.44	21.13	52.59	74.84
	6	HORVU.MOREX.r3.5HG0480620	86.4	98.45	44.96	63.45	87.55	69.73	63.47	100.36	72.23	81.63	88.95	82.22	89.65	99.38	76.98	93.12	80.25	76.94	110.97	37.92	44.53	89.25	79.3	79.21	76.01	80.63	93.58	88	76.05	87.31	105.11	104.8	114.81	89.66
	7	HORVU.MOREX.r3.7HG0661950	84.07	112.73	56.44	62.97	97.3	69.13	71.97	111.45	63.04	68.55	95.41	64.37	80.15	114.55	69.94	82.68	101.41	75.58	110.24	43.18	40.22	156.76	98.82	107.06	73.5	79.76	74.98	76.91	71.96	105.5	114.85	126.77	130.29	105.76
	8	HORVU.MOREX.r3.5HG0490180	1030.69	850.98	625.92	841.6	912.57	1049.62	948.73	892.63	909.72	874.46	812.62	950.24	959.57	1101.94	1061.5	794.82	824.94	859.88	8420.25	875.58	329.4	1095.31	865.1	780.55	768.51	960.16	869.01	970.07	647.24	850.31	723.61	645.39	587.91	557.6
	9	HORVU.MOREX.r3.3HG0232890	0.27	0	0.08	0.01	0.02	0.06	0.04	0.01	0.03	0.07	0.01	0.03	0.01	0.11	0.02	0.01	0.01	0.01	0.01	0	0	0	0.01	0.04	0	0.01	0.01	0.17	0	0	0	0	0	0
	10	HORVU.MOREX.r3.3HG0232910	2.88	0.12	0.42	0.17	0.3	2.36	2.36	0.51	4.62	1.67	0.34	11.93	1.26	0.9	21.38	5.15	0.36	24.18	7.94	34.93	2.34	19.08	0.61	1.08	1.61	4.33	8.99	22.23	1.33	3.14	3.7	3.81	8.79	12.2
	11	HORVU.MOREX.r3.1HG0001110	0.02	0.25	1.11	0.59	0.15	0.9	0.02	1.11	0.88	0	0	0.06	0	0	0.07	0	0.26	0	0	0.46	0.26	0	0.19	0	0.06	0	0.02	0	0.05	0	0.22	0	0	0
	12	HORVU.MOREX.r3.1HG0001420	0.02	0.05	0.53	0.05	0.01	0.01	0.01	0.03	0.15	0.02	0.05	0.01	0	0	0	0	0.02	0	0	0.07	0.1	0	0	0.01	0.01	0.01	0	0	0	0	0.41	0.01	0	0
	13	HORVU.MOREX.r3.1HG0001420	0.02	0.05	0.53	0.05	0.01	0.01	0.01	0.03	0.15	0.02	0.05	0.01	0	0	0	0	0.02	0	0	0.07	0.1	0	0	0.01	0.01	0.01	0	0	0	0	0.41	0.01	0	0
	14	HORVU.MOREX.r3.2HG0167220	0	0	0	0	0	0	0	0	0	0	0	0	0	0	0	0	0	0	0	0	0	0	0	0	0	0	0	0	0	0	0	0	0	0
	15	HORVU.MOREX.r3.2HG0167220	0	0	0	0	0	0	0	0	0	0	0	0	0	0	0	0	0	0	0	0	0	0	0	0	0	0	0	0	0	0	0	0	0	0
	16	HORVU.MOREX.r3.2HG0167220	0	0	0	0	0	0	0	0	0	0	0	0	0	0	0	0	0	0	0	0	0	0	0	0	0	0	0	0	0	0	0	0	0	0
	17	HORVU.MOREX.r3.2HG0167220	0	0	0	0	0	0	0	0	0	0	0	0	0	0	0	0	0	0	0	0	0	0	0	0	0	0	0	0	0	0	0	0	0	0
	18	HORVU.MOREX.r3.2HG0167220	0	0	0	0	0	0	0	0	0	0	0	0	0	0	0	0	0	0	0	0	0	0	0	0	0	0	0	0	0	0	0	0	0	0
	19	HORVU.MOREX.r3.2HG0120840	0.01	0	0.03	0.02	0	0	0	0	0.01	0	0	0	0	0.01	0.02	0	0	0	0	0	0	0	0	0	0	0	0	0	0	0.01	0.01	0.09	0	0
	20	HORVU.MOREX.r3.6HG0591100	17.78	18.26	9.96	12.47	20.16	16.51	17.5	21.74	16.81	19.19	19.53	17.84	18.82	25.33	19.89	21.51	21.64	24.95	22.31	18.75	64.74	8.22	18.85	23.2	21.67	23.67	26.69	24.39	21.61	49.03	80.82	70.19	107.73	85.83
	21	HORVU.MOREX.r3.2HG0138840	1.64	0.84	0.91	0.35	0.85	0.64	0.57	0.88	1.11	0.77	1.07	1.2	1.09	1.55	1.62	0.98	0.87	2.44	1.36	3.34	18.03	0.05	0.83	0.66	0.76	1.07	1.28	1.62	0.02	0.12	0.03	0	0.01	0.14
	22	HORVU.MOREX.r3.3HG0276570	130.05	109.93	108.47	79	130.82	119.44	112.41	138.42	116.4	109.2	122.77	127.53	116.04	150.88	120.96	114.03	127.06	126.58	132.89	146.34	187.41	239.57	125.78	134.34	119.08	151.8	140.44	112.38	131.55	136.36	129	109.86	109.84	95.45
	23	HORVU.MOREX.r3.5HG0421460	265.74	282.62	51.64	143.87	232.72	197.97	176.3	252.53	169.81	144.26	147.17	220.27	197.26	236.92	234.33	221.11	126.55	258.53	189.61	99.12	194.83	134.84	220.02	133.96	92.61	209.89	155.12	180.22	243.44	336.85	213.72	303.31	270.76	275.33
	24	HORVU.MOREX.r3.5HG0511770	5.61	5.51	4.46	4.65	5.82	5.96	6.41	5.67	4.82	5.77	4.36	6.05	5.44	6.53	7.29	4.94	4.68	6.98	4.01	7.24	13.3	100.64	5.02	4.79	5.27	6.75	6.55	8.75	3.77	2.93	2.49	2.13	2.93	3.5
	25	HORVU.MOREX.r3.7HG0677930	0.44	0.36	0.22	0.29	0.45	0.32	0.32	0.26	0.23	0.18	0.26	0.32	0.22	0.31	0.13	0.15	0.09	0.13	0.21	0	0	0	0.36	0.35	0.33	0.22	0.21	0.23	0.58	1.05	1.42	1.46	1.66	0.99
	26	HORVU.MOREX.r3.2HG0173200	2.07	0.82	1.57	1.09	1.24	2.17	1.71	0.79	1.56	1.55	1.07	1.34	1.48	1.25	2.05	2.07	0.65	1.84	1.3	3.9	17.11	0.47	2.16	1.94	1.69	2.47	2.26	3.54	7.92	10.02	12.58	8.86	9	8.77
	27	HORVU.MOREX.r3.4HG0417260	0	0	0.14	0.03	0.01	0	0	0.03	0	0.01	0	0	0	0.01	0.01	0	0.02	0	0	0	0.01	0.01	0	0	0	0.01	0	0	0	0	0.07	0	0	0
	28	HORVU5Hr1G124160	0	0	0	0	0	0	0	0	0	0	0	0	0	0	0	0	0	0	0	0	0	0	0	0	0	0	0	0	0	0	0	0	0	0
	29	HORVU.MOREX.r3.5HG0469020	5.27	17.27	1.14	2.16	34.19	5.81	7.65	33.74	10.11	8.68	40.42	4.36	3.52	106.02	21.54	16.79	28.29	10.97	6.11	35.34	2175.34	0.79	10.48	22.49	20.94	53.62	82.75	74.92	19.8	168.86	592.11	606.94	1103.01	841.72
	30	HORVU.MOREX.r3.5HG0468970	11.15	30.82	6.04	4.02	62.21	24.84	10.03	71.19	19.81	23.34	86.03	16.31	14.95	236.08	60.33	60.15	74.18	29.23	18.19	87.19	7067.61	1.7	29.15	67.49	79.82	158.65	229.78	258.61	52.29	574.81	1473.13	1796.79	3199	2567.7
	31	HORVU.MOREX.r3.1HG0037500	0.14	0.92	0.68	0.44	2.82	0.6	1.29	3.02	2.55	0.95	4.05	1.67	0.47	21.74	2.34	1.45	2.5	0.25	1.07	4.62	323.08	0.08	1.45	9.08	9.34	21.68	19.12	9.5	6.11	83.8	231.16	274.04	311.69	185.61
	32	HORVU.MOREX.r3.7HG0635350	5.26	0.26	2.5	2.97	0.76	16.43	5.36	1.19	24.51	4.2	2.87	16.56	2.01	7.49	11.34	4.58	6.39	7.35	4.98	2.32	2.52	0	3.54	7.65	9.31	10.83	10.09	8.46	12.91	25.15	18.79	17.59	23.58	29.96
	33	HORVU.MOREX.r3.5HG0451540	38.59	28.71	21.61	22.61	33.13	29.75	29.53	36.3	24.89	30.25	35.43	36.15	38.68	53.52	46.26	35.11	38.1	49.86	41.28	69.84	58.79	49.03	29.79	33.23	30.11	52.12	45.02	52.46	39.54	69.48	66.01	75.67	105.98	101.5
	34	HORVU.MOREX.r3.5HG0421460	265.74	282.62	51.64	143.87	232.72	197.97	176.3	252.53	169.81	144.26	147.17	220.27	197.26	236.92	234.33	221.11	126.55	258.53	189.61	99.12	194.83	134.84	220.02	133.96	92.61	209.89	155.12	180.22	243.44	336.85	213.72	303.31	270.76	275.33
	35	HORVU.MOREX.r3.5HG0421370	662.63	401.66	349.84	301.03	495.32	560.65	545.9	498.28	407.95	507.16	392.82	434.37	568.51	681.28	566.94	592.04	414.13	432.8	599.75	412.77	172.62	853.64	547.67	529.22	451.78	650.49	532.06	483.95	478.62	575.42	442.92	456.1	358.37	262.81
	36	HORVU.MOREX.r3.2HG0123830	4.63	3.05	3.93	2.88	3.58	7.15	8.88	2.76	4.62	7.66	2.35	6.74	7.96	3.07	9.19	8.39	1.93	7.85	7.12	6.09	0.62	1.92	6.56	6.98	7.15	10.91	8.25	9.11	18.59	19.31	16.12	17.32	20.68	17.35
	37	HORVU.MOREX.r3.4HG0335040	0	0	0	0	0	0	0	0	0	0	0	0	0	0	0	0	0	0	0.01	0	0.04	0.02	0	0	0	0	0	0	0	0	0	0	0	0
	38	HORVU.MOREX.r3.5HG0456950	41.65	24.74	35.18	32.68	26.98	39.96	37.94	29.16	35.59	34.28	25.4	37.3	33.12	32.66	34.28	34.28	20.98	31.09	38.97	31.16	42.2	36.85	42.33	35.74	35.45	42.19	38.88	34.3	35.76	31.04	25.7	19.7	21.26	17.71
	39	HORVU.MOREX.r3.4HG0370860	254.21	197.93	131.53	163.41	208.41	192	197.31	208.12	153.09	184.71	179.72	181.81	206.32	241.77	189.1	197.75	172.04	140.62	217.42	240.55	66.64	250.41	191.19	161.66	147.24	185.34	196.27	180.61	175.68	144.09	138.57	100.46	118.45	97.96
	40	HORVU.MOREX.r3.7HG0671890	1.46	0.88	1.92	1.31	0.93	1.48	1.07	1.12	1.55	0.84	1.04	1.71	1.14	1.28	1.77	1.24	0.75	1.99	1.99	2	13.54	1.17	1.91	1.96	1.34	2.21	1.81	2.54	1.6	1.94	0.87	0.82	1.25	1.25
	41	HORVU.MOREX.r3.4HG0385790	704.66	495.56	826.76	501.99	625.81	841.71	750.05	673.7	770.4	723.01	644.88	765.38	803.94	794	865.66	880.79	537.45	598.57	497.58	166.18	52.28	92.15	956.34	789.23	751.86	903.26	895.97	566.61	1280.21	991.17	951.85	739.98	618.31	407.57
	42	HORVU.MOREX.r3.4HG0369570	272.86	324.95	162.4	218.1	353.11	299.42	303.87	337.14	240.14	254.42	297.63	289.97	294.7	371.07	258.84	272.26	314.5	218.05	308.17	197.46	79.13	537.68	296.75	280.4	243.06	306.17	305.75	276.1	253.56	296.29	266.71	236.21	231.46	191.86
	43	HORVU.MOREX.r3.3HG0290880	10.11	13.84	3.65	10.26	16.17	10.7	9.98	19.01	14.12	8.72	18.21	19.59	10.43	32.41	13.63	8.14	14.87	16.46	16.45	23.69	16.29	316.03	9.81	6.58	6.63	12.31	8.77	19.45	6.36	14.63	9.99	14.38	17.1	29.86
	44	HORVU.MOREX.r3.7HG0720010	3.66	0.92	1.05	0.7	0.03	1.98	2.1	0.87	1.25	1.62	0.7	1.88	1.82	1.97	3.73	2.59	1.11	5.05	3.86	4.95	21.22	17.45	2.15	1.39	1.29	3.46	2.87	6	1.71	3.54	1.64	2.08	2.66	4.16
	45	HORVU.MOREX.r3.4HG0345760	0	0	0	0	0	0	0	0	0	0	0	0	0	0	0	0	0	0	0	0	0	0	0	0	0	0	0	0	0	0	0	0	0	0
	46	HORVU.MOREX.r3.3HG0304680	275.76	223.62	112.15	131.09	306.02	292.2	288.57	259.31	157.79	306.36	193.8	217.2	291.76	272.52	225.87	202.77	186.69	171.2	191.54	68.18	49.74	696.54	207.34	159.38	202.64	251.25	219.48	213.99	231.06	279.65	247.55	210.04	170.2	157.04
	47	HORVU.MOREX.r3.4HG0392240	0.17	0.07	0.17	0.05	0.08	0.18	0.06	0.06	0.16	0.07	0.02	0.13	0.11	0.06	0.04	0.38	0.08	0.07	1.03	0	0.27	0.22	0.17	0.09	0.09	0.15	0.26	0.36	0.15	0.18	0.26	0.36	0.48	0.51

## Sheet: Sheet6
		Supplementary Table S3
		Light																		Shade
		Double Ridhe			Triple Mound			Glume Primordium			Legmma Primodium			Stamen Primordium			Awa Primordium			Double Ridhe			Triple Mound			Glume Primordium			Legmma Primodium			Stamen Primordium			Awa Primordium
	Hordeum vulgare Morex V3	I-Dr-IM	I-Dr-LRM	I-Dr-SRM	I-Tm-IM	I-Tm-LSM	I-Tm-CSM	I-Gp-IM	I-Gp-LSM	I-Gp-CSM	I-Lp-IM	I-Lp-LSM	I-Lp-CSM	I-Sp-IM	I-Sp-LSM	I-Sp-CSM	I-Ap-IM	I-Ap-LSM	I-Ap-CSM	I-Dr-IM	I-Dr-LRM	I-Dr-SRM	I-Tm-IM	I-Tm-LSM	I-Tm-CSM	I-Gp-IM	I-Gp-LSM	I-Gp-CSM	I-Lp-IM	I-Lp-LSM	I-Lp-CSM	I-Sp-IM	I-Sp-LSM	I-Sp-CSM	I-Ap-IM	I-Ap-LSM	I-Ap-CSM
	HORVU.MOREX.r3.2HG0202350	3.55	1.14	0.72	4.34	2.47	2.23	3.9	2.99	2.3	2.07	6.1	2.64	4.43	11.29	3.01	1.39	16.99	4.81	3.5	2.02	1.19	2.73	1.54	1.63	1.77	1.64	2.24	3.43	4.29	2.71	1.42	10.45	2.17	3.19	13.46	4.73
	HORVU.MOREX.r3.6HG0613270	32.39	4.54	6.07	34.63	34.02	25.71	33.15	21.9	21.61	19.82	28.59	17.11	29.15	30.85	24.68	21.72	21.17	17.15	45.88	40.07	11.94	27.81	16.75	22.67	19.19	14.52	18.06	34.99	20.8	18.12	20.89	19.79	17.12	31.1	12.12	22.01
	HORVU.MOREX.r3.UnG0798500	0	0	0	0	0	0	0	0	0	0	0	0	0	0	0	0	0	0	0	0	0	0	0	0	0	0	0	0	0	0	0	0	0	0	0	0
	HORVU.MOREX.r3.UnG0808370	2.45	1.05	2	4.24	5.05	6.29	2.84	4.47	3.54	6.15	6.36	4.62	5.45	5.78	4.66	3.96	11.07	5.32	4.92	6.9	7.81	4.31	4.55	4.82	2.2	4.72	5.41	3.97	4	3.53	5.27	5.3	5.09	4.28	5.16	4.13
	HORVU.MOREX.r3.5HG0483130	0.52	0.58	0.34	0.79	0.56	0.58	0.66	0.56	0.62	0.67	0.8	0.63	3.07	1.4	1.14	0.5	1.97	1.62	1.11	0.79	0.43	0.9	0.82	0.83	0.37	0.35	0.76	2.17	0.82	1.3	0.96	1.27	1.31	1.03	1.32	2.08
	HORVU.MOREX.r3.5HG0480620	98.45	44.96	63.45	87.55	69.73	63.47	100.36	72.23	81.63	88.95	82.22	89.65	99.38	74.45	93.12	80.25	76.94	110.97	86.2	58.83	51.59	83.8	57.63	60.61	55.58	48.35	59.77	85.18	58.72	76.51	83.85	71.86	77.9	74.27	66.07	85.23
	HORVU.MOREX.r3.7HG0661950	112.73	56.44	62.97	97.3	69.13	71.97	111.45	63.04	68.55	95.41	64.37	80.15	114.55	71.56	82.68	101.41	75.58	110.24	115.6	79.73	68.07	113.08	78.39	79.13	62.26	59.12	85.02	124.85	72.13	95.76	107.12	58.34	91.49	69.74	49.03	74.91
	HORVU.MOREX.r3.5HG0490180	850.98	625.92	841.6	912.57	1049.62	948.73	892.63	909.72	874.46	812.62	950.24	950.24	1101.94	1119.29	794.82	824.94	859.88	842.25	746.5	919.5	739.18	689.65	777.1	797.85	442.07	663.27	693.77	1028.32	834.6	938.38	858.91	916.77	854.24	1064.44	1015.38	1033.06
	HORVU.MOREX.r3.3HG0232890	0	0.08	0.01	0.02	0.06	0.04	0.01	0.03	0.07	0.01	0.03	0.01	0.11	0.02	0.01	0.01	0.01	0.01	0.03	0.07	0	0.01	0.03	0	0	0.01	0.01	0.06	0	0.01	0.01	0.01	0	0.02	0.01	0
	HORVU.MOREX.r3.3HG0232910	0.12	0.42	0.17	0.3	2.36	0.73	0.51	4.62	1.67	0.34	11.93	1.26	0.9	21.02	5.15	0.36	24.18	7.94	0.4	0.6	0.23	0.29	1.31	0.78	0.21	3.11	1.67	0.62	10.3	1.77	0.72	22.1	3.09	2.59	27.25	10.56
	HORVU.MOREX.r3.1HG0001110	0.25	1.11	0.59	0.15	0.9	0.02	1.11	0.88	0	0	0.06	0	0	0.05	0	0.26	0	0	0.49	0.02	2.1	0	0	0	0	0	0	0.04	0.15	0	0.02	0	0	1.01	0	0
	HORVU.MOREX.r3.1HG0001420	0.05	0.53	0.05	0.01	0.01	0.01	0.03	0.15	0.02	0.05	0.01	0	0	0	0	0.02	0	0	0.02	0.13	1.94	0	0.01	0.06	0.03	0.01	0.01	0	0.11	0	0	0	0	0.01	0	0
	HORVU.MOREX.r3.1HG0001420	0	0	0	0	0	0	0	0	0	0	0	0	0	0	0	0	0	0	0	0	0	0	0	0	0	0	0	0	0	0	0	0	0	0	0	0
	HORVU.MOREX.r3.2HG0167220	0	0	0	0	0	0	0	0	0	0	0	0	0	0	0	0	0	0	0	0	0	0	0	0	0	0	0	0	0	0	0	0	0	0	0	0
	HORVU.MOREX.r3.2HG0167220	0	0	0	0	0	0	0	0	0	0	0	0	0	0	0	0	0	0	0	0	0	0	0	0	0	0	0	0	0	0	0	0	0	0	0	0
	HORVU.MOREX.r3.2HG0167220	0	0	0	0	0	0	0	0	0	0	0	0	0	0	0	0	0	0	0	0	0	0	0	0	0	0	0	0	0	0	0	0	0	0	0	0
	HORVU.MOREX.r3.2HG0167220	0	0	0	0	0	0	0	0	0	0	0	0	0	0	0	0	0	0	0	0	0	0	0	0	0	0	0	0	0	0	0	0	0	0	0	0
	HORVU.MOREX.r3.2HG0167220	0	0	0	0	0	0	0	0	0	0	0	0	0	0	0	0	0	0	0	0	0	0	0	0	0	0	0	0	0	0	0	0	0	0	0	0
	HORVU.MOREX.r3.2HG0120840	0	0.03	0.02	0	0	0	0	0.01	0.01	0	0	0	0.01	0.02	0	0	0	0	1.09	0.02	0	0	0	0	0	0	0	0	0	0	0	0	0	0.15	0	0
	HORVU.MOREX.r3.6HG0591100	18.26	9.96	12.47	20.16	16.51	16.51	21.74	16.81	19.19	19.53	17.84	18.82	25.33	20.07	21.51	21.64	24.95	22.31	18.8	18.72	16.49	18.16	15.25	17.93	12.57	15.44	18.34	20.39	17.34	20.12	17.57	18.77	21.01	19.02	16.87	21.19
	HORVU.MOREX.r3.2HG0138840	0.84	0.91	0.35	0.85	0.64	0.57	0.88	1.11	0.77	1.07	1.2	1.09	1.55	1.54	0.98	0.87	2.44	1.36	0.9	0.95	0.38	0.76	0.73	0.73	0.5	0.91	0.73	1.12	1.56	1.32	1.06	2	0.9	0.9	2.69	1.39
	HORVU.MOREX.r3.3HG0276570	109.93	108.47	79	130.82	119.44	112.41	138.42	116.4	109.2	127.77	127.53	116.04	150.88	118.49	114.03	127.06	126.58	132.89	146.71	130.13	97.51	127.53	118.18	109.07	75.65	78.23	100.96	165.5	111.55	123.3	135.65	112.59	106.63	134.36	101.36	112.04
	HORVU.MOREX.r3.5HG0421460	282.62	51.64	143.87	232.72	197.97	176.3	252.53	169.81	144.26	147.17	220.27	197.26	236.92	224.35	221.11	126.55	258.53	189.61	295.59	123.17	126.53	184.34	140.67	135.79	107.69	84.79	127.85	188.18	144.74	149.04	109.65	170.75	151.23	158.58	225.08	310.43
	HORVU.MOREX.r3.5HG0511770	5.51	4.46	4.65	5.82	5.96	6.41	5.67	4.82	5.77	4.36	6.05	5.44	6.53	7.45	4.94	4.68	6.98	4.01	6.68	5.97	5.02	4.64	4.24	4.96	3.23	4.86	4.83	6.51	6.01	5.56	4.8	6.11	3.98	6.01	6.84	4.57
	HORVU.MOREX.r3.7HG0677930	0.36	0.22	0.29	0.45	0.32	0.32	0.26	0.23	0.18	0.26	0.32	0.22	0.31	0.09	0.15	0.09	0.13	0.21	0.39	0.39	0.17	0.29	0.27	0.29	0.23	0.14	0.18	0.25	0.14	0.05	0.1	0.1	0.09	0.08	0.14	0.1
	HORVU.MOREX.r3.2HG0173200	0.82	1.57	1.09	1.24	2.17	1.71	0.79	1.56	1.55	1.07	1.34	1.48	1.25	2.12	2.07	0.65	1.84	1.3	0.89	2.01	0.85	0.9	1.19	1.76	1.03	1.73	1.64	1.18	1.97	1.83	0.82	1.97	1.86	2.06	2.79	2.6
	HORVU.MOREX.r3.4HG0417260	0	0.14	0.03	0.01	0	0	0.03	0	0.01	0	0	0	0.01	0.01	0	0.02	0	0	0	0	0.27	0	0	0.01	0.02	0	0.01	0	0.01	0.01	0	0.01	0	0.06	0	0
	HORVU5Hr1G124160	0	0	0	0	0	0	0	0	0	0	0	0	0	0	0	0	0	0	0	0	0	0	0	0	0	0	0	0	0	0	0	0	0	0	0	0
	HORVU.MOREX.r3.5HG0469020	17.27	1.14	2.16	34.19	5.81	7.65	33.74	10.11	8.68	40.42	4.36	3.52	106.02	20.72	16.79	28.29	10.97	6.11	9.63	3.54	1.16	10.85	1.63	1.63	11.2	1.37	5.21	18.51	3.56	2.91	30.34	8.25	5.9	51.18	9.13	11.02
	HORVU.MOREX.r3.5HG0468970	30.82	6.04	4.02	62.21	24.84	16.03	71.19	19.81	23.34	86.03	16.31	14.95	236.08	55.96	60.15	74.18	29.23	18.19	18.7	13.02	4.43	28.68	5.07	11.39	27.58	4.76	15.62	50.18	8.7	15.12	78.97	27.01	22.62	122.28	17.21	33.43
	HORVU.MOREX.r3.1HG0037500	0.92	0.68	0.44	2.82	0.6	1.29	3.02	2.55	0.95	4.05	1.67	0.47	21.74	2.21	1.45	2.5	0.25	1.07	0.54	1.43	0.26	0.91	0.3	0.94	0.63	0.16	1.03	2.53	0.22	0.19	1.82	0.3	0.39	3.07	0.41	0.58
	HORVU.MOREX.r3.7HG0635350	0.26	2.5	2.97	0.76	16.43	5.36	1.19	24.51	4.2	2.87	16.56	2.01	7.49	10.3	4.58	6.39	7.35	4.98	0.24	3.66	1.84	0.56	11.24	3.58	0.5	8.65	3.1	1.52	10.89	1.66	3.43	9.7	3.94	17.01	15.72	9.92
	HORVU.MOREX.r3.5HG0451540	28.71	21.61	22.61	33.13	29.75	29.53	36.3	24.89	30.25	35.43	36.15	38.68	53.52	45.24	35.11	38.1	49.86	41.28	39.34	36.14	23.5	34.27	27.26	28.65	21.25	21.66	27.04	56.17	32.7	42.52	40.1	39.23	39.64	49.27	42.77	48.93
	HORVU.MOREX.r3.5HG0421460	282.62	51.64	143.87	232.72	197.97	176.3	252.53	169.81	144.26	147.17	220.27	197.26	236.92	224.35	221.11	126.55	189.61	189.61	295.59	123.17	126.53	184.34	140.67	135.79	107.69	84.79	127.85	188.18	144.74	149.04	109.65	170.75	151.23	158.58	225.08	310.43
	HORVU.MOREX.r3.5HG0421370	401.66	349.84	301.03	495.32	560.65	545.9	498.28	407.95	507.16	392.82	434.37	568.51	681.28	573.9	592.04	414.13	432.8	599.75	551.25	579.62	390.12	418.38	415.12	452.88	244.8	308.61	434.71	728.05	403.7	630.62	489.09	411.12	532.38	494.96	322.33	515.55
	HORVU.MOREX.r3.2HG0123830	3.05	3.93	2.88	3.58	7.15	8.88	2.76	4.62	7.66	2.35	6.74	7.96	3.07	9.34	8.39	1.93	7.85	7.12	3.08	6.2	2.68	2.75	6.08	7.27	2.48	4.5	8.03	3.48	6.37	8.19	2.38	6.82	7.7	3.33	6.56	10.97
	HORVU.MOREX.r3.4HG0335040	0	0	0	0	0	0	0	0	0	0	0	0	0	0	0	0	0	0.01	0	0	0	0	0	0	0	0	0	0	0	0	0	0	0	0	0	0
	HORVU.MOREX.r3.5HG0456950	24.74	35.18	32.68	26.98	39.96	37.94	29.19	35.59	34.28	25.4	37.3	33.12	32.66	38.7	34.28	20.98	31.09	38.97	33.88	39.22	31.93	29.05	35.59	34.76	18.37	26.51	29.45	36.9	32.69	36.51	33.19	36.83	34.21	29.93	26.18	37.74
	HORVU.MOREX.r3.4HG0370860	197.93	131.53	163.41	208.41	192	197.31	208.12	153.09	184.71	179.72	181.81	206.32	241.77	199.17	197.75	172.04	140.62	217.42	213.18	164.13	131.16	179.56	133.92	158.9	115.46	100.37	125.49	217.59	136.71	206.68	199.15	149.97	177.48	198.18	124.28	179.11
	HORVU.MOREX.r3.7HG0671890	0.88	1.92	1.31	0.93	1.48	1.07	1.12	1.55	0.84	1.04	1.71	1.14	1.28	1.68	1.24	0.75	1.99	1.99	1.17	1.52	1.23	1.13	1.8	1.67	0.73	1.19	1.13	2.16	2.08	1.22	1.23	1.67	1.1	1.67	2.22	2.22
	HORVU.MOREX.r3.4HG0385790	495.56	826.76	501.99	625.81	841.71	750.05	673.7	770.4	723.01	644.88	765.38	803.94	794	833.48	880.79	537.45	598.57	497.58	454.64	698.27	416.79	545.16	649.96	591.51	432.12	595.59	653.55	755.2	718.1	917.66	677.67	816.84	905.35	747.74	663.18	781.43
	HORVU.MOREX.r3.4HG0369570	324.95	162.4	218.1	353.11	299.42	303.87	337.14	240.14	254.42	297.63	289.97	294.7	371.07	259.49	272.26	314.5	218.05	308.17	339.35	277.78	223.03	313.24	234.24	260.62	208.79	183.14	201.85	354.43	217.01	273.68	324.81	221.11	247.13	286.18	174.28	226.19
	HORVU.MOREX.r3.3HG0290880	13.84	3.65	10.26	16.17	10.7	9.98	19.01	14.12	8.72	18.21	19.59	10.43	32.41	13.88	8.14	14.87	16.46	16.45	15.84	8.37	7.88	13.6	7.64	7.35	8.75	7.79	5.99	21.85	13.92	9.33	18.84	13.43	8.31	16.21	14.78	11.69
	HORVU.MOREX.r3.7HG0720010	0.92	1.05	0.7	1.03	1.98	2.1	0.87	1.25	1.62	0.7	1.88	1.82	1.97	4.03	2.59	1.11	5.05	3.86	1.38	2.59	1.22	1.03	1.45	1.74	0.48	0.8	1.72	2.78	1.77	2.8	1.04	2.3	2.61	1.93	2.29	4.44
	HORVU.MOREX.r3.4HG0345760	0	0	0	0	0	0	0	0	0	0	0	0	0	0	0	0	0	0	0	0	0	0	0	0	0	0	0	0	0	0	0	0	0	0	0	0
	HORVU.MOREX.r3.3HG0304680	223.62	112.15	131.09	306.02	292.2	288.57	259.31	157.79	306.36	193.8	217.2	291.76	272.52	233.16	202.77	186.69	171.12	191.54	224.69	166.18	134.33	201.62	137.85	189.94	136.35	127.32	203.09	244.74	144.59	214.98	190.46	175.89	168.58	207.12	149.99	175.5
	HORVU.MOREX.r3.4HG0392240	0.07	0.17	0.05	0.08	0.18	0.06	0.06	0.16	0.07	0.02	0.13	0.11	0.06	0.05	0.38	0.08	0.07	1.03	0.02	0.23	0.02	0.05	0.14	0.1	0.04	0.09	0.08	0.12	0.09	0.08	0.03	0.11	0.09	0.04	0.1	0.49
